# Supplementary material for: Recruiting and Engaging American Indian and Alaska Native Teens and Young Adults in a SMS Help-Seeking Intervention: Lessons Learned from the BRAVE Study
Source: MDPI journal article supplement (doi:10.3390/ijerph17249437), 2020-12-16
Supplement: s1 [file s1]

## Figures Supplement 2

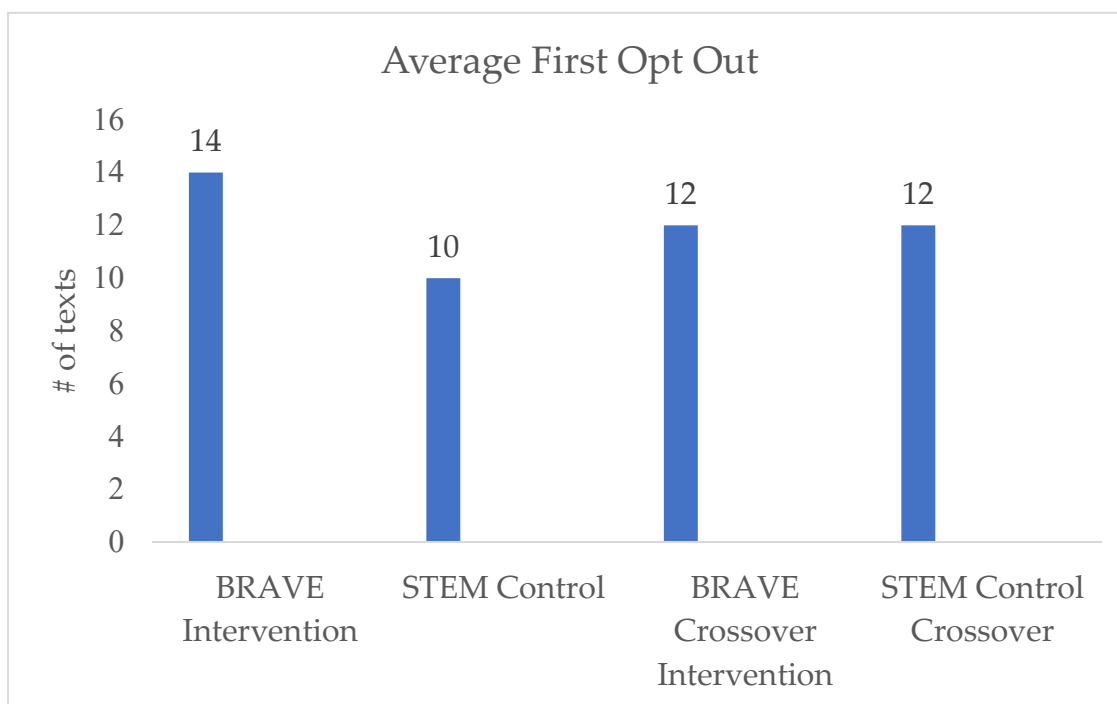

**Figure 1.** This is a figure describing the BRAVE and STEM opt-outs based on the number of text received.

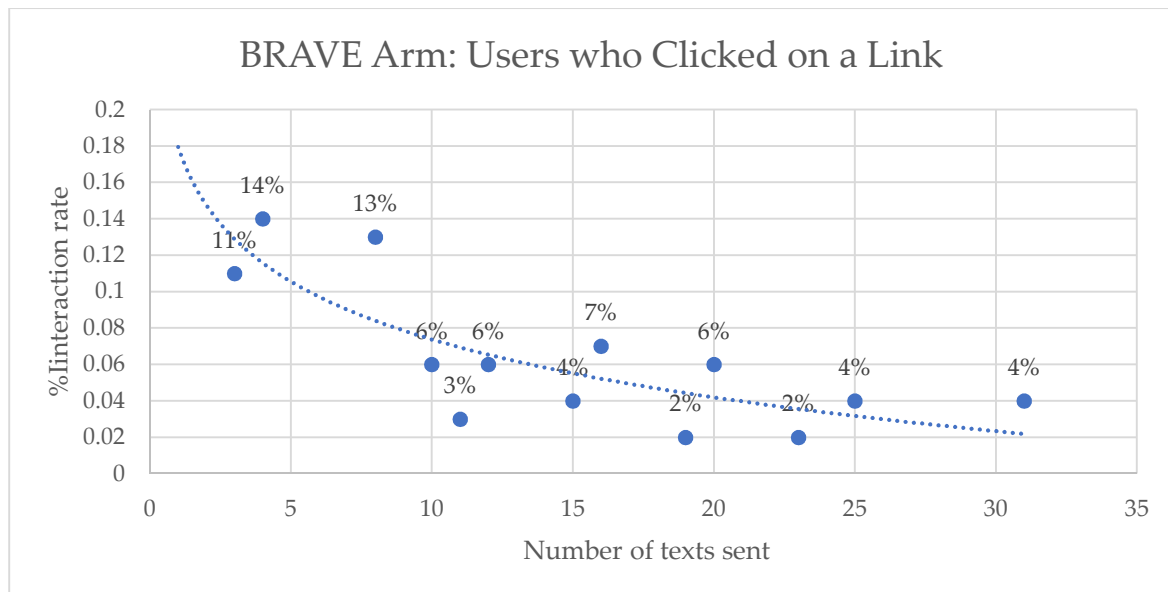

**Figure 2.** This is a figure showing the BRAVE arm intervention users interaction rate and text messages sent.

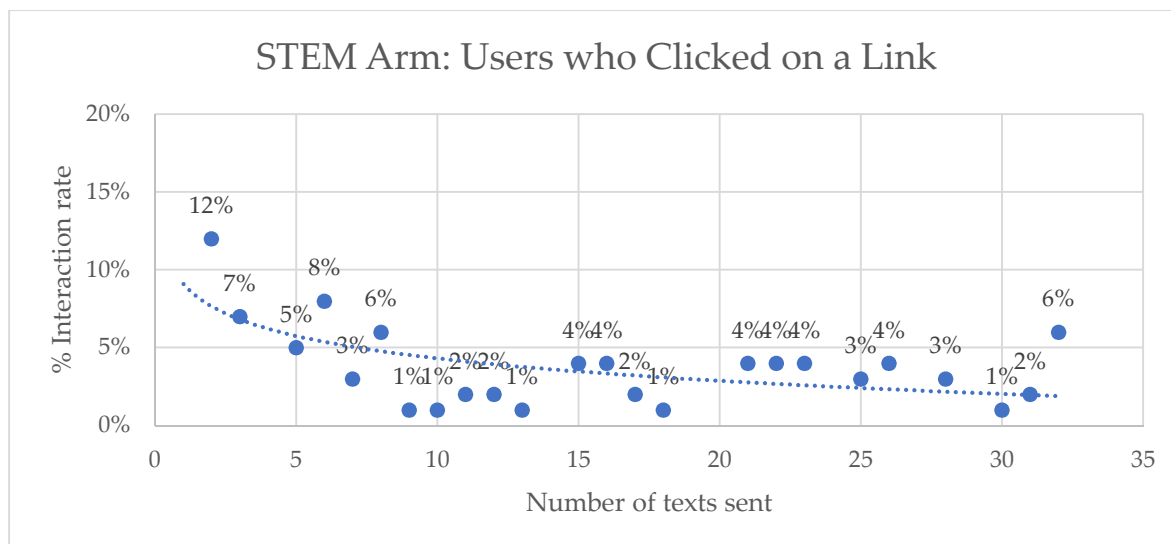

**Figure 3.** This is a figure showing the STEM arm control group interaction rate and text messages sent.
